# Supplementary material for: Dissociative photoionization of mono-, di- and trimethylamine studied by a combined threshold photoelectron photoion coincidence spectroscopy and computational approach
Source: Royal Society of Chemistry journal article supplement (doi:10.1039/b511203f), 2005-11-11

**Supplementary Material to**

**Dissociative Photoionization of Mono-, Di- and Trimethylamine Studied by a Combined  
Threshold Photoelectron Photoion Coincidence Spectroscopy and Computational  
Approach**

Andras Bodi<sup>‡</sup>, Bálint Sztáray<sup>‡</sup> and Tomas Baer<sup>\*,§</sup>

<sup>‡</sup>Department of General and Inorganic Chemistry, Eotvos Lorand University, Budapest, Hungary

<sup>§</sup>Department of Chemistry, University of North Carolina, Chapel Hill, NC,

\*corresponding author

Table S1 Calculated frequencies, barriers, and rotational constants used in RRKM analysis

|                                                                                                                |                                                                                                                                                                                                                          |
|----------------------------------------------------------------------------------------------------------------|--------------------------------------------------------------------------------------------------------------------------------------------------------------------------------------------------------------------------|
| NH <sub>2</sub> (CH <sub>3</sub> ) frequencies / cm <sup>-1</sup>                                              | 316, 851, 980, 1056, 1170, 1352, 1461, 1497, 1519, 1669, 2949, 3052, 3088, 3488, 3562                                                                                                                                    |
| NH <sub>2</sub> (CH <sub>3</sub> ) rotational constants / GHz                                                  | 103.44, 22.69, 21.82                                                                                                                                                                                                     |
| NH <sub>2</sub> (CH <sub>3</sub> ) internal rotation                                                           | 1 CH <sub>3</sub> rotor, $V = 6$ kJ/mol*, $I = 3.12$ amu·Å <sup>2</sup>                                                                                                                                                  |
| NH <sub>2</sub> (CH <sub>3</sub> ) <sup>+</sup> frequencies / cm <sup>-1</sup>                                 | 66, 709, 912, 995, 1068, 1233, 1332, 1407, 1476, 1634, 2829, 3062, 3143, 3441, 3548                                                                                                                                      |
| NH <sub>2</sub> (CH <sub>3</sub> ) <sup>+</sup> rotational constants / GHz                                     | 106.11, 23.81, 22.08                                                                                                                                                                                                     |
| NH <sub>2</sub> (CH <sub>3</sub> ) <sup>+</sup> internal rotation                                              | 1 CH <sub>3</sub> free rotor, $I = 3.22$ amu·Å <sup>2</sup>                                                                                                                                                              |
| NH <sub>2</sub> (CH <sub>3</sub> ) <sup>+</sup> TS frequencies <sup>‡</sup> / cm <sup>-1</sup>                 | 526, 556, 813, 932, 1085, 1201, 1324, 1422, 1572, 1738, 3108, 3228, 3466, 3578                                                                                                                                           |
| NH(CH <sub>3</sub> ) <sub>2</sub> <sup>+</sup> TS reverse barrier / kJ/mol ; critical freq. / cm <sup>-1</sup> | 1.8, 1000                                                                                                                                                                                                                |
| NH <sub>2</sub> (CH <sub>3</sub> ) <sup>+</sup> TS rotational constants / GHz                                  | 85.61, 24.50, 23.69                                                                                                                                                                                                      |
| NH(CH <sub>3</sub> ) <sub>2</sub> frequencies / cm <sup>-1</sup>                                               | 250, 383, 780, 942, 1036, 1098, 1168, 1185, 1268, 1444, 1471, 1476, 1488, 1494, 1519, 1520, 2912, 2918, 3041, 3042, 3088, 3089, 3518                                                                                     |
| NH(CH <sub>3</sub> ) <sub>2</sub> rotational constants / GHz                                                   | 34.70, 9.26, 8.18                                                                                                                                                                                                        |
| NH(CH <sub>3</sub> ) <sub>2</sub> internal rotation                                                            | 2 CH <sub>3</sub> rotors, $V = 14.2$ kJ/mol, $I = 3.03$ amu·Å <sup>2</sup>                                                                                                                                               |
| NH(CH <sub>3</sub> ) <sub>2</sub> <sup>+</sup> frequencies / cm <sup>-1</sup>                                  | 250, 383, 780, 942, 1036, 1098, 1168, 1185, 1268, 1444, 1471, 1476, 1488, 1494, 1519, 1520, 2912, 2918, 3041, 3042, 3088, 3089, 3518                                                                                     |
| NH(CH <sub>3</sub> ) <sub>2</sub> <sup>+</sup> rotational constants / GHz                                      | 40.48, 8.58, 7.76                                                                                                                                                                                                        |
| NH(CH <sub>3</sub> ) <sub>2</sub> <sup>+</sup> internal rotation                                               | 2 CH <sub>3</sub> free rotors, $I = 3.09$ amu·Å <sup>2</sup>                                                                                                                                                             |
| NH(CH <sub>3</sub> ) <sub>2</sub> <sup>+</sup> TS frequencies / cm <sup>-1</sup>                               | 160, 322, 459, 524, 706, 935, 1031, 1075, 1149, 1197, 1250, 1418, 1446, 1459, 1470, 1503, 1761, 3028, 3103, 3129, 3147, 3224, 3491                                                                                       |
| NH(CH <sub>3</sub> ) <sub>2</sub> <sup>+</sup> TS rotational constants / GHz                                   | 36.87, 8.91, 8.16                                                                                                                                                                                                        |
| NH(CH <sub>3</sub> ) <sub>2</sub> <sup>+</sup> TS reverse barrier / kJ/mol ; critical freq. / cm <sup>-1</sup> | 4.0, 1190                                                                                                                                                                                                                |
| NH(CH <sub>3</sub> ) <sub>2</sub> <sup>+</sup> TS internal rotation                                            | 1 CH <sub>3</sub> rotor, $V = 5.8$ kJ/mol, $I = 3.11$ amu·Å <sup>2</sup>                                                                                                                                                 |
| N(CH <sub>3</sub> ) <sub>3</sub> frequencies / cm <sup>-1</sup>                                                | 260, 350, 421, 422, 831, 1058, 1059, 1071, 1119, 1119, 1119, 1204, 1305, 1306, 1443, 1444, 1482, 1482, 1484, 1491, 1501, 1513, 1513, 2888, 2890, 2906, 3049, 3049, 3054, 3089, 3094, 3094                                |
| N(CH <sub>3</sub> ) <sub>3</sub> rotational constants / GHz                                                    | 8.68, 8.68, 4.91                                                                                                                                                                                                         |
| N(CH <sub>3</sub> ) <sub>3</sub> internal rotation                                                             | 3 CH <sub>3</sub> rotors, $V = 18.2$ kJ/mol, $I = 3.13$ amu·Å <sup>2</sup>                                                                                                                                               |
| N(CH <sub>3</sub> ) <sub>3</sub> <sup>+</sup> frequencies / cm <sup>-1</sup>                                   | 85, 334, 409, 411, 764, 1013, 1014, 1017, 1018, 1088, 1132, 1293, 1293, 1417, 1420, 1422, 1452, 1452, 1455, 1486, 1486, 1503, 3005, 3005, 3016, 3062, 3064, 3064, 3165, 3168, 3168                                       |
| N(CH <sub>3</sub> ) <sub>3</sub> <sup>+</sup> rotational constants / GHz                                       | 8.42, 8.42, 4.57                                                                                                                                                                                                         |
| N(CH <sub>3</sub> ) <sub>3</sub> <sup>+</sup> internal rotation                                                | 3 CH <sub>3</sub> free rotors, $I = 3.22$ amu·Å <sup>2</sup>                                                                                                                                                             |
| N(CH <sub>3</sub> ) <sub>3</sub> <sup>+</sup> TS frequencies / cm <sup>-1</sup>                                | 146, <u>316</u> , <u>345</u> , <u>402</u> , <u>491</u> , <u>549</u> , 832, 868, 1012, 1075, 1123, 1165, 1174, 1186, 1328, 1429, 1445, 1448, 1452, 1469, 1474, 1502, 1763, 3022, 3025, 3105, 3118, 3120, 3145, 3147, 3225 |
| N(CH <sub>3</sub> ) <sub>3</sub> <sup>+</sup> TS rotational constants / GHz                                    | 8.73, 8.37, 4.76                                                                                                                                                                                                         |
| N(CH <sub>3</sub> ) <sub>3</sub> <sup>+</sup> TS reverse barrier / kJ/mol ; critical freq. / cm <sup>-1</sup>  | 7.4, 1200                                                                                                                                                                                                                |
| N(CH <sub>3</sub> ) <sub>3</sub> <sup>+</sup> TS internal rotation                                             | 2 CH <sub>3</sub> rotors, $V = 6.9$ kJ/mol, $I = 3.19$ amu·Å <sup>2</sup>                                                                                                                                                |

Frequencies corresponding to (degenerate) internal rotations are in italics. Optimized transition state (TS) frequencies are underlined. \*The methylamine internal rotation barrier was decreased to better reproduce the shape of the thermal energy distribution based on the breakdown diagram. ‡Ab initio frequencies. Fit frequencies are discussed in the text.

Figure S1. Potential energy curve of H-loss from monomethylamine at different levels of theory.

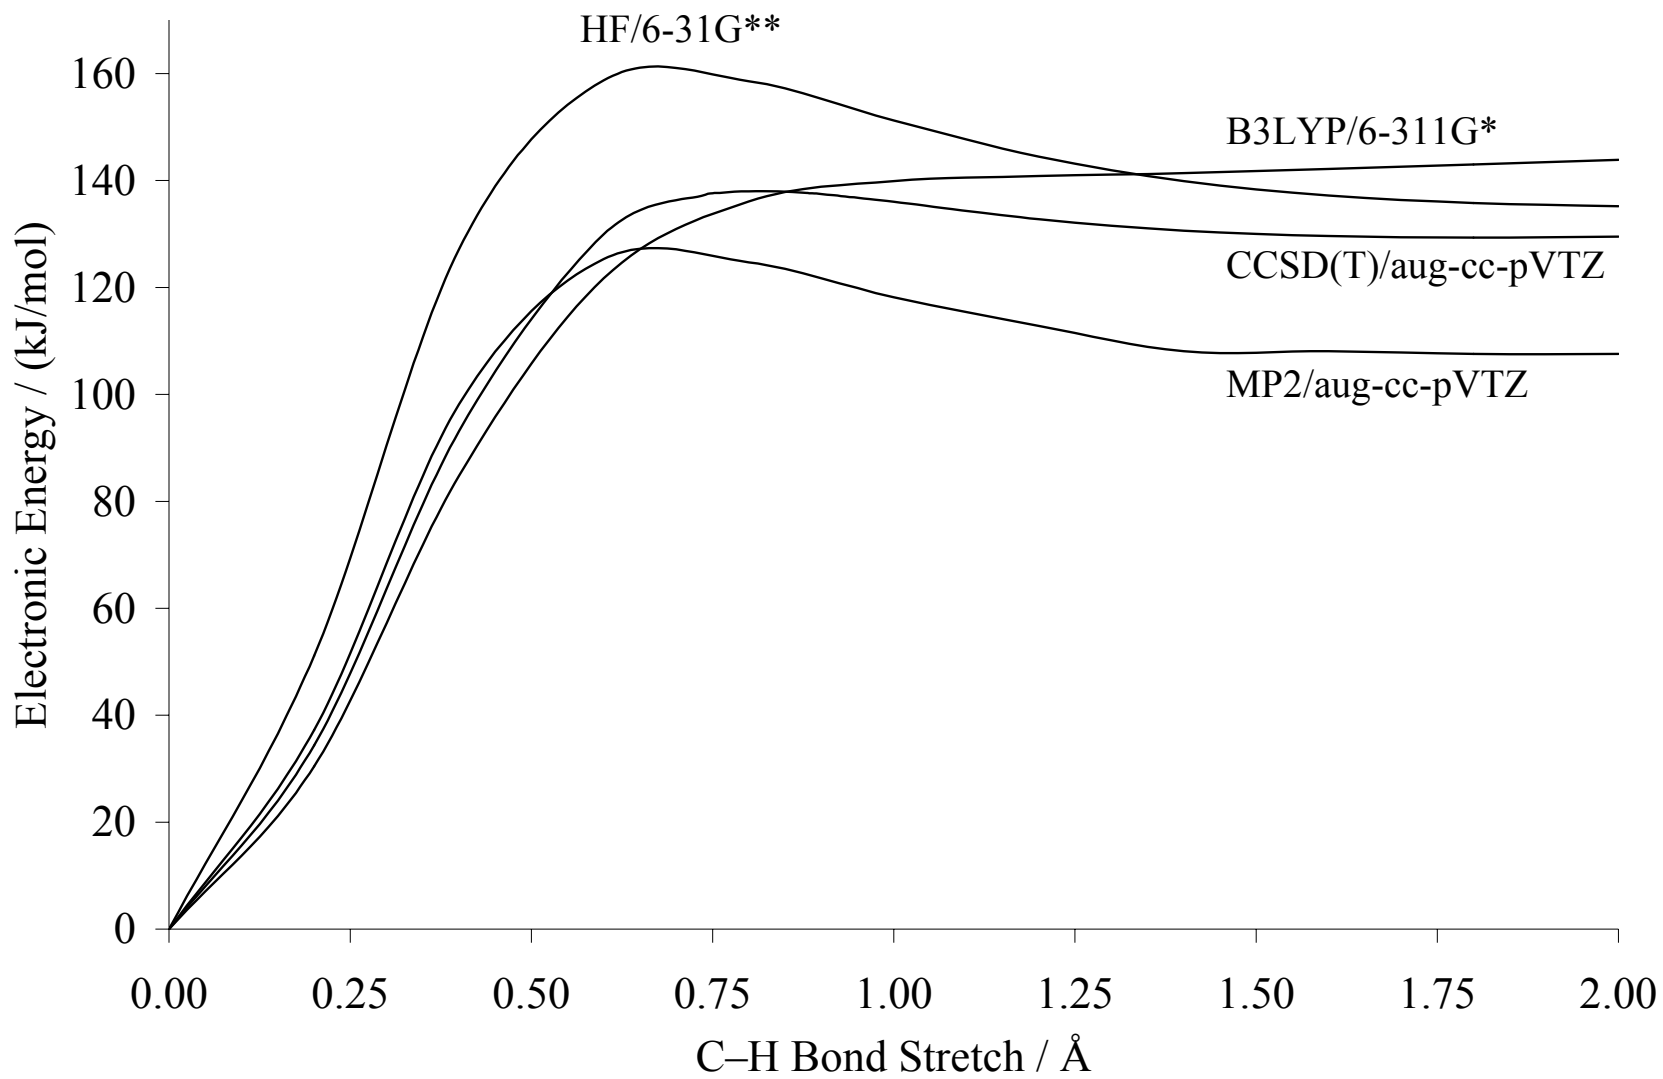

Figure S2. Error analysis obtained by plotting the error in fitting data as a function of the assumed reaction enthalpy. Transition state frequencies were varied to obtain a best fit to the data. The steepness of the goodness of fit curve indicates how sensitive the fit is to the onset.

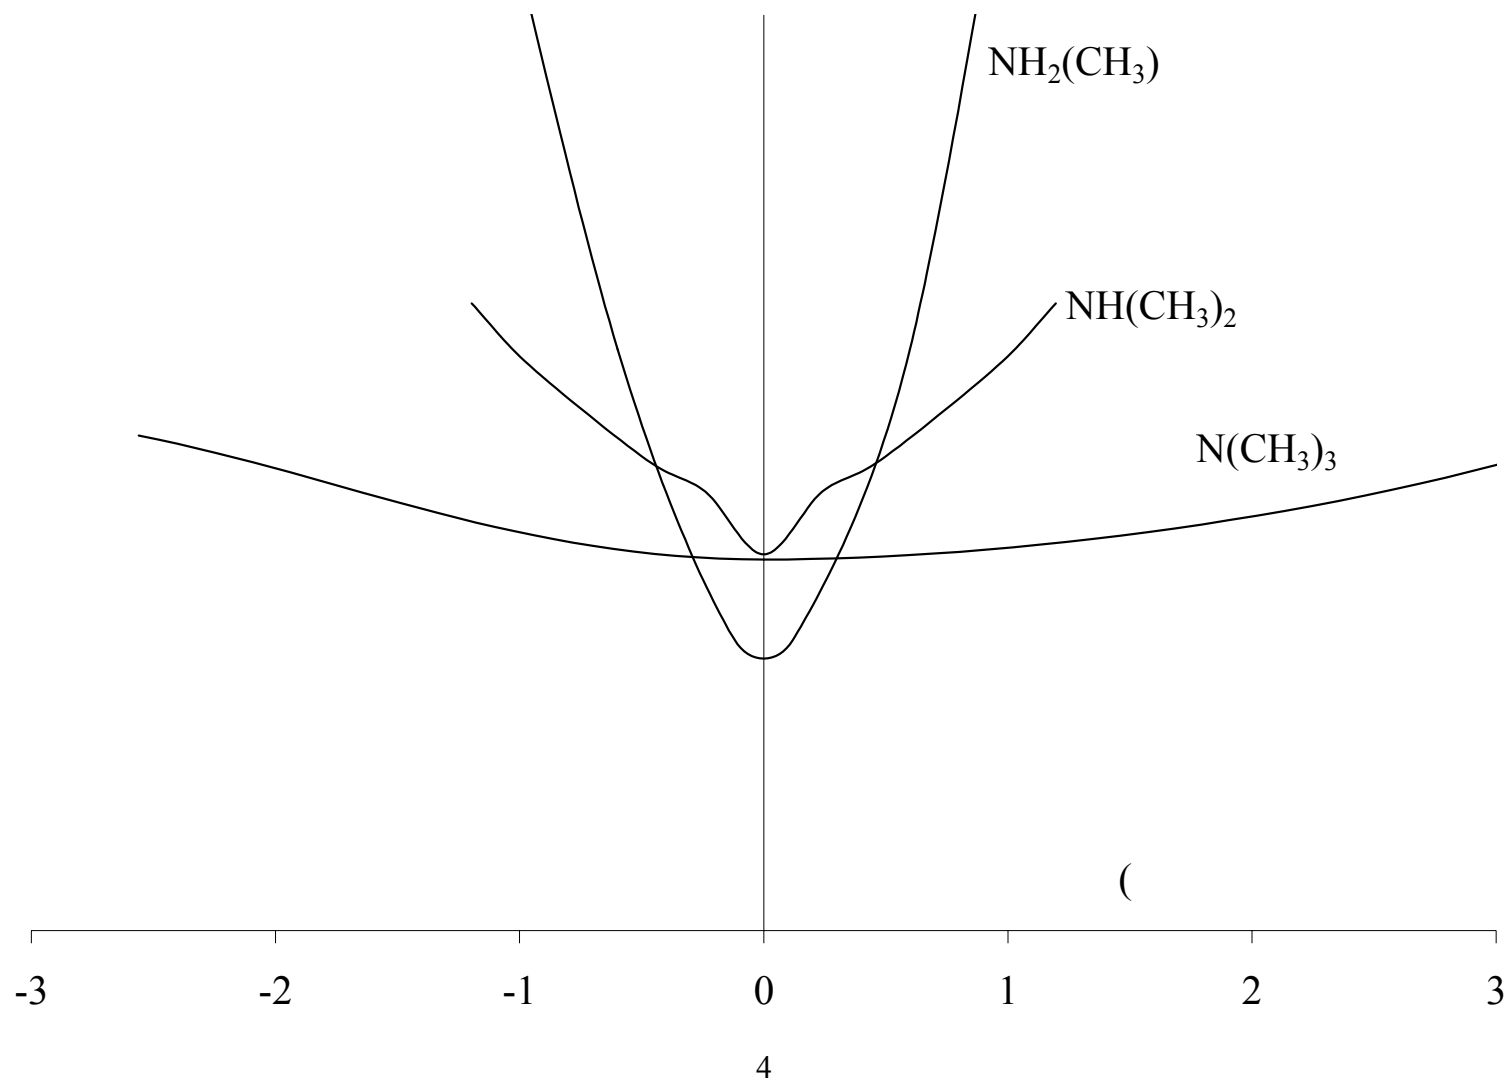

Supplement: b511203f.pdf [file b511203f.pdf]
